# Supplementary material for: Hydrothermal generation, structural versatility and properties of metal(ii)-organic architectures driven by a pyridine-tricarboxylic acid
Source: Royal Society of Chemistry journal article supplement (doi:10.1039/c9dt01253b), 2019-01-01
Supplement: c9dt01253b1.pdf [file c9dt01253b1.pdf]

## Electronic Supplementary Information (ESI)

### Hydrothermal generation, structural versatility and properties of metal(II)-organic architectures driven by a pyridine-tricarboxylic acid

Na Zhao,<sup>a</sup> Yu Li,<sup>\*a</sup> Jin-Zhong Gu,<sup>b</sup> Marina V. Kirillova<sup>c</sup> and Alexander M. Kirillov<sup>\*c,d</sup>

<sup>a</sup>Guangdong Research Center for Special Building Materials and Its Green Preparation Technology, Guangdong Industry Polytechnic, Guangzhou, 510300, People's Republic of China, Fax: +86-20-61230629; Tel: +86-20-61230629, E-mail: liyuletter@163.com

<sup>b</sup>College of Chemistry and Chemical Engineering, Lanzhou University, Lanzhou 730000, People's Republic of China

<sup>c</sup>Centro de Química Estrutural, Instituto Superior Técnico, Universidade de Lisboa, Av. Rovisco Pais, 1049-001, Lisbon, Portugal, Tel.: +351 218417178, E-mail: kirillov@tecnico.ulisboa.pt

<sup>d</sup>Peoples' Friendship University of Russia (RUDN University), 6 Miklukho-Maklaya st., Moscow, 117198, Russian Federation

†Electronic Supplementary Information (ESI) available: synthesis and analytical data for **2–12**, structural parameters (Tables S1 and S2), additional structural representations (Figs. S1–S5), coordination modes of  $H_2cpia^-$ ,  $Hcpia^{2-}$ , or  $cpia^{3-}$  in other compounds (Scheme S1), emission data (Table S3), PXRD patterns (Fig. S6 and S13), diffuse reflectance spectra (Fig. S7), absorption spectra of the MB solutions in catalytic tests including kinetic data (Figs. S8–S11), and catalyst recycling experiments (Fig. S12). CCDC-1876103–1876114.

## Synthesis and analytical data for 2–12

**Synthesis of [M(Hcpia)(phen)(H<sub>2</sub>O)<sub>2</sub>] (M = Co, **2**; Ni, **3**; Zn, **4**).** A mixture of MCl<sub>2</sub>·xH<sub>2</sub>O (*x* = 6 for **2**; *x* = 6 for **3** and *x* = 0 for **4**, 0.2 mmol), H<sub>3</sub>cpia (57.4 mg, 0.2 mmol), phen (40.0 mg, 0.2 mmol), NaOH (16.0 mg, 0.4 mmol), and H<sub>2</sub>O (10 mL) was stirred at room temperature for 15 min, then sealed in a 25 mL Teflon-lined stainless steel vessel, and heated at 120 °C for 3 days, followed by cooling to room temperature at a rate of 10 °C·h<sup>-1</sup>. Crystals of **2–4** were isolated manually, and washed with distilled water. Yield: 65% for **2**, 50% for **3**, 55% for **4** (based on H<sub>3</sub>cpia). Anal. Calcd for C<sub>26</sub>H<sub>19</sub>CoN<sub>3</sub>O<sub>8</sub> (**2**): C 55.73, H 3.42, N 7.50%. Found: C 55.61, H 3.40, N 7.53%. IR (KBr, cm<sup>-1</sup>): 3335 w, 3049 w, 1691 m, 1592 s, 1516 w, 1475 w, 1428 w, 1376 m, 1352 w, 1271 m, 1230 w, 1137 w, 1097 w, 1038 w, 1009 w, 921 w, 875 w, 846 m, 787 w, 723 m, 699 w, 682 w, 664 w, 636w. Calcd for C<sub>26</sub>H<sub>19</sub>NiN<sub>3</sub>O<sub>8</sub> (**3**): C 55.75, H 3.42, N 7.50%. Found: C 55.63, H 3.41, N 7.55%. IR (KBr, cm<sup>-1</sup>): 3324 w, 3061 w, 1685 m, 1586 s, 1516 w, 1487 w, 1428 w, 1399 m, 1376 w, 1352 w, 1271 m, 1236 w, 1137 w, 1091 w, 1038 w, 1009 w, 927 w, 852 m, 793 w, 776 w, 723 m, 700 w, 676 w, 648 w. Calcd for C<sub>26</sub>H<sub>19</sub>ZnN<sub>3</sub>O<sub>8</sub> (**4**): C 55.09, H 3.38, N 7.41%. Found: C 55.21, H 3.36, N 7.45%. IR (KBr, cm<sup>-1</sup>): 3405 w, 3160 w, 1685 m, 1586 s, 1516 w, 1487 w, 1428 w, 1394 s, 1358 w, 1277 m, 1230 w, 1142 w, 1097 w, 1038 w, 1009 w, 921 w, 875 w, 846 m, 811 w, 770 w, 723 m, 705 w, 682 w, 642 w.

**Synthesis of [Zn(Hcpia)(2,2'-bipy)(H<sub>2</sub>O)<sub>2</sub>]<sub>5</sub>·4H<sub>2</sub>O (**5**).** A mixture of ZnCl<sub>2</sub> (27.3 mg, 0.20 mmol), H<sub>3</sub>cpia (57.4 mg, 0.20 mmol), 2,2'-bipy (31.2 mg, 0.2 mmol), NaOH (16.0 mg, 0.4 mmol), and H<sub>2</sub>O (10 mL) was stirred at room temperature for 15 min, then sealed in a 25 mL Teflon-lined stainless steel vessel, and heated at 120 °C for 3 days, followed by cooling to room temperature at a rate of 10 °C·h<sup>-1</sup>. Colourless block-shaped crystals of **5** were isolated manually, washed with distilled water and dried (yield 55% based on H<sub>3</sub>cpia). Anal. Calcd for C<sub>120</sub>H<sub>103</sub>Zn<sub>5</sub>N<sub>15</sub>O<sub>44</sub>: C, 51.73; H, 3.73; N, 7.54. Found: C, 51.59; H, 3.75; N, 7.57%. IR (KBr, cm<sup>-1</sup>): 3434 w, 3112 w, 1714 m, 1602 m, 1546 m, 1474 w, 1434 w, 1413 s, 1388 w, 1337 m, 1311 w, 1275 w, 1235 m, 1153 w, 1117 w, 1097 w, 1046 w, 1016 w, 934 w, 912 w, 882 w, 837 w, 806 w, 776 m, 730 w, 694 w, 654 w.

**Synthesis of [Zn<sub>2</sub>(μ-Hcpia)<sub>2</sub>(2,2'-bipy)<sub>2</sub>] (**6**).** Synthesis of **6** was similar to **5** except using 160 °C

instead of 120 °C. Colorless block-shaped crystals of **6** were isolated manually, washed with distilled water and dried (yield 61% based on H<sub>3</sub>cpia). Anal. Calcd for C<sub>24</sub>H<sub>15</sub>ZnN<sub>3</sub>O<sub>6</sub>: C, 56.88; H, 2.98; N, 8.29. Found: C, 56.71; H, 3.00; N, 8.34%. IR (KBr, cm<sup>-1</sup>): 1711 w, 1655 s, 1599 s, 1565 m, 1470 w, 1437 w, 1386 w, 1342 m, 1276 w, 1231 m, 1153 w, 1114 w, 1097 w, 1041 w, 1013 w, 963 w, 914 w, 886 w, 830 w, 806 w, 763 m, 728 w, 695 w, 657 w.

**Synthesis of [M( $\mu$ -Hcpia)(phen)(H<sub>2</sub>O)]<sub>n</sub> (M = Co, **7**; Cd, **8**).** A mixture of CoCl<sub>2</sub>·6H<sub>2</sub>O /CdCl<sub>2</sub>·H<sub>2</sub>O (0.20 mmol), H<sub>3</sub>cpia (57.4 mg, 0.20 mmol), phen (40.0 mg, 0.20 mmol), NaOH (16.0 mg, 0.40 mmol), and H<sub>2</sub>O (10 mL) was stirred at room temperature for 15 min, then sealed in a 25 mL Teflon-lined stainless steel vessel, and heated at 160 °C for 3 days, followed by cooling to room temperature at a rate of 10 °C·h<sup>-1</sup>. Pink (**7**) or colorless (**8**) block-shaped crystals of **7** and **8** were isolated manually, washed with distilled water and dried (yield 60% for **7**; 55% for **8** based on H<sub>3</sub>cpia). Anal. Calcd for C<sub>26</sub>H<sub>17</sub>CoN<sub>3</sub>O<sub>7</sub> (**7**): C, 57.58; H, 3.16; N, 7.75. Found: C, 57.41; H, 3.13; N, 7.70%. IR for **7** (KBr, cm<sup>-1</sup>): 3434 w, 3189 w, 1644 s, 1597 s, 1540 w, 1510 w, 1428 w, 1388 s, 1341 w, 1230 w, 1160 w, 1142 w, 1038 w, 1021 w, 944 w, 858 m, 840 w, 811 w, 787 w, 729 w, 711 w, 670 w. Anal. Calcd for C<sub>26</sub>H<sub>17</sub>CdN<sub>3</sub>O<sub>7</sub> (**8**): C, 52.41; H, 2.88; N, 7.05. Found: C, 52.57; H, 2.89; N, 7.09%. IR for **8** (KBr, cm<sup>-1</sup>): 3434 w, 3331 w, 3127 w, 1694 w, 1607 m, 1592 w, 1541 w, 1449 w, 1383 s, 1296 w, 1240 w, 1158 w, 1082 w, 1041 w, 1010 w, 898 w, 842 m, 776 w, 724 w, 684 w, 659 w.

**Synthesis of {[Pb( $\mu$ -Hcpia)]·2H<sub>2</sub>O}<sub>n</sub> (**9**).** A mixture of PbCl<sub>2</sub> (55.6 mg, 0.20 mmol), H<sub>3</sub>cpia (57.4 mg, 0.20 mmol), NaOH (16.0 mg, 0.40 mmol), and H<sub>2</sub>O (10 mL) was stirred at room temperature for 15 min, then sealed in a 25 mL Teflon-lined stainless steel vessel, and heated at 160 °C for 3 days, followed by cooling to room temperature at a rate of 10 °C·h<sup>-1</sup>. Colourless block-shaped crystals of **9** were isolated manually, washed with distilled water and dried (yield 58% based on H<sub>3</sub>cpia). Anal. Calcd for C<sub>14</sub>H<sub>11</sub>PbNO<sub>8</sub>: C, 31.82; H, 2.10; N, 2.65. Found: C, 31.71; H, 2.12; N, 2.62%. IR (KBr, cm<sup>-1</sup>): 3440 w, 1674 w, 1586 m, 1568 m, 1540 s, 1499 w, 1376 s, 1301 w, 1242 w, 1160 w, 1131 w, 1068 w, 1038 w, 1009 w, 933 w, 875 w, 846 w, 816 m, 787 w, 770 w, 688 w, 658 w.

**Synthesis of {[Cd<sub>4</sub>( $\mu_3$ -cpia)<sub>2</sub>Cl<sub>2</sub>(phen)<sub>6</sub>(H<sub>2</sub>O)<sub>2</sub>]·10H<sub>2</sub>O}<sub>n</sub> (**10**).** A mixture of CdCl<sub>2</sub>·H<sub>2</sub>O (60.3 mg,

0.30 mmol), H<sub>3</sub>cpia (57.4 mg, 0.20 mmol), phen (60.0 mg, 0.30 mmol), NaOH (24.0 mg, 0.60 mmol), and H<sub>2</sub>O (10 mL) was stirred at room temperature for 15 min, then sealed in a 25 mL Teflon-lined stainless steel vessel, and heated at 160 °C for 3 days, followed by cooling to room temperature at a rate of 10 °C·h<sup>-1</sup>. Colourless block-shaped crystals of **10** were isolated manually, washed with distilled water and dried (yield 41% based on H<sub>3</sub>cpia). Anal. Calcd for C<sub>100</sub>H<sub>84</sub>Cl<sub>2</sub>Cd<sub>4</sub>N<sub>14</sub>O<sub>24</sub>: C, 50.33; H, 3.55; N, 8.22. Found: C, 50.48; H, 3.53; N, 8.27%. IR (KBr, cm<sup>-1</sup>): 3440 w, 3061 w, 1609 m, 1592 s, 1552 s, 1422 m, 1394 m, 1358 w, 1306 w, 1248 w, 1166 w, 1131 w, 1097 w, 1044 w, 1015 w, 921 w, 846 w, 822 w, 770 w, 729 w, 706 w, 670 w.

**Synthesis of {[Zn<sub>3</sub>(μ<sub>3</sub>-cpia)<sub>2</sub>(phen)<sub>3</sub>]·10H<sub>2</sub>O}<sub>n</sub> (**11**).** A mixture of ZnCl<sub>2</sub> (40.9 mg, 0.3 mmol), H<sub>3</sub>cpia (57.4 mg, 0.20 mmol), phen (60.0 mg, 0.30 mmol), NaOH (24.0 mg, 0.60 mmol), and H<sub>2</sub>O (10 mL) was stirred at room temperature for 15 min, then sealed in a 25 mL Teflon-lined stainless steel vessel, and heated at 160 °C for 3 days, followed by cooling to room temperature at a rate of 10 °C·h<sup>-1</sup>. Colourless block-shaped crystals of **11** were isolated manually, washed with distilled water and dried (yield 55% based on H<sub>3</sub>cpia). Anal. Calcd for C<sub>64</sub>H<sub>56</sub>Zn<sub>3</sub>N<sub>8</sub>O<sub>22</sub>: C, 51.75; H, 3.80; N, 7.54. Found: C, 51.65; H, 3.77; N, 7.59%. IR (KBr, cm<sup>-1</sup>): 3438 m, 3331 w, 3056 w, 1638 m, 1607 s, 1561 w, 1515 w, 1449 w, 1429 m, 1368 s, 1250 w, 1168 w, 1138 w, 1102 w, 1046 w, 1016 w, 924 w, 842 m, 786 w, 724 m, 669 w.

**Synthesis of {[Zn<sub>4</sub>(μ<sub>4</sub>-cpia)<sub>2</sub>(μ-OH)<sub>2</sub>(μ-4,4'-bipy)<sub>2</sub>]·4,4'-bipy·2H<sub>2</sub>O}<sub>n</sub> (**12**).** A mixture of ZnCl<sub>2</sub> (40.9 mg, 0.3 mmol), H<sub>3</sub>cpia (57.4 mg, 0.20 mmol), 4,4'-bipy (46.8 mg, 0.30 mmol), NaOH (28.0 mg, 0.70 mmol), and H<sub>2</sub>O (10 mL) was stirred at room temperature for 15 min, then sealed in a 25 mL Teflon-lined stainless steel vessel, and heated at 160 °C for 3 days, followed by cooling to room temperature at a rate of 10 °C·h<sup>-1</sup>. Colourless block-shaped crystals of **12** were isolated manually, washed with distilled water and dried (yield 52% based on H<sub>3</sub>cpia). Anal. Calcd for C<sub>58</sub>H<sub>42</sub>Zn<sub>4</sub>N<sub>8</sub>O<sub>16</sub>: C, 50.90; H, 3.09; N, 8.19. Found: C, 51.05; H, 3.07; N, 8.25%. IR (KBr, cm<sup>-1</sup>): 3487 w, 3044 w, 1633 s, 1609 s, 1574 w, 1540 w, 1487 w, 1423 w, 1393 w, 1364 s, 1260 w, 1225 w, 1160 w, 1131 w, 1073 w, 1044 w, 1009 w, 875 w, 851 w, 817 m, 776 w, 717 w, 676 w, 642 w.

**Table S1.** Selected bond lengths [Å] and angles [°] for compounds **1–12**.<sup>a</sup>

|                   |                 |                   |            |                     |            |
|-------------------|-----------------|-------------------|------------|---------------------|------------|
| <b>1</b>          |                 |                   |            |                     |            |
| Mn(1)-O(2)        | 2.149(2)        | Mn(1)-O(2)#1      | 2.149(2)   | Mn(1)-O(7)          | 2.154(2)   |
| Mn(1)-O(7)#1      | 2.154(2)        | Mn(1)-N(1)        | 2.262(3)   | Mn(1)-N(1)#1        | 2.262(3)   |
| O(2)-Mn(1)-O(2)#1 | 170.66(13)      | O(2)#1-Mn(1)-O(7) | 93.96(9)   | O(2)-Mn(1)-O(7)     | 92.79(9)   |
| O(7)-Mn(1)-O(7)#1 | 87.36(15)       | O(2)-Mn(1)-N(1)   | 74.75(8)   | O(2)-Mn(1)-N(1)#1   | 98.94(9)   |
| O(7)-Mn(1)-N(1)#1 | 88.97(10)       | O(7)-Mn(1)-N(1)   | 166.74(9)  | N(1)-Mn(1)-N(1)#1   | 97.32(13)  |
| <b>2</b>          |                 |                   |            |                     |            |
| Co(1)-O(2)        | 2.108(2)        | Co(1)-O(7)        | 2.158(2)   | Co(1)-O(8)          | 2.065(2)   |
| Co(1)-N(1)        | 2.134(2)        | Co(1)-N(2)        | 2.155(2)   | Co(1)-N(3)          | 2.102(2)   |
| O(8)-Co(1)-N(3)   | 98.40(8)        | O(8)-Co(1)-O(2)   | 172.71(8)  | N(3)-Co(1)-O(2)     | 86.68(8)   |
| O(8)-Co(1)-N(1)   | 98.11(8)        | N(3)-Co(1)-N(1)   | 162.66(8)  | O(2)-Co(1)-N(1)     | 77.39(7)   |
| O(8)-Co(1)-N(2)   | 86.17(8)        | N(3)-Co(1)-N(2)   | 77.77(9)   | O(2)-Co(1)-N(2)     | 100.08(8)  |
| N(1)-Co(1)-N(2)   | 98.11(8)        | O(8)-Co(1)-O(7)   | 87.18(7)   | N(3)-Co(1)-O(7)     | 91.16(8)   |
| O(2)-Co(1)-O(7)   | N(3)-Co(1)-O(7) | N(1)-Co(1)-O(7)   | 94.91(8)   | N(2)-Co(1)-O(7)     | 166.10(8)  |
| <b>3</b>          |                 |                   |            |                     |            |
| Ni(1)-O(2)        | 2.067(2)        | Ni(1)-O(7)        | 2.114(2)   | Ni(1)-O(8)          | 2.060(2)   |
| Ni(1)-N(1)        | 2.085(2)        | Ni(1)-N(2)        | 2.067(2)   | Ni(1)-N(3)          | 2.099(2)   |
| O(8)-Ni(1)-O(2)   | 172.98(7)       | O(8)-Ni(1)-N(2)   | 98.41(8)   | O(2)-Ni(1)-N(2)     | 86.97(7)   |
| O(8)-Ni(1)-N(1)   | 95.74(7)        | O(2)-Ni(1)-N(1)   | 79.25(7)   | N(2)-Ni(1)-N(1)     | 165.31(8)  |
| O(8)-Ni(1)-N(3)   | 86.11(8)        | O(2)-Ni(1)-N(3)   | 99.36(8)   | N(2)-Ni(1)-N(3)     | 79.58(8)   |
| N(1)-Ni(1)-N(3)   | 97.54(8)        | O(8)-Ni(1)-O(7)   | 87.40(7)   | O(2)-Ni(1)-O(7)     | 88.09(7)   |
| N(2)-Ni(1)-O(7)   | 90.07(8)        | N(1)-Ni(1)-O(7)   | 94.49(7)   | N(3)-Ni(1)-O(7)     | 166.84(7)  |
| <b>4</b>          |                 |                   |            |                     |            |
| Zn(1)-O(2)        | 2.147(2)        | Zn(1)-O(7)        | 2.169(2)   | Zn(1)-O(8)          | 2.082(2)   |
| Zn(1)-N(1)        | 2.125(2)        | Zn(1)-N(2)        | 2.120(2)   | Zn(1)-N(3)          | 2.188(2)   |
| O(8)-Zn(1)-N(2)   | 99.77(9)        | O(8)-Zn(1)-N(1)   | 97.46(8)   | N(2)-Zn(1)-N(1)     | 161.83(9)  |
| O(8)-Zn(1)-O(2)   | 70.96(8)        | N(2)-Zn(1)-O(2)   | 86.40(8)   | N(1)-Zn(1)-O(2)     | 77.20(8)   |
| O(8)-Zn(1)-O(7)   | 86.45(8)        | N(2)-Zn(1)-O(7)   | 90.21(9)   | N(1)-Zn(1)-O(7)     | 96.60(8)   |
| O(2)-Zn(1)-O(7)   | 86.93(8)        | O(8)-Zn(1)-N(3)   | 86.74(9)   | N(2)-Zn(1)-N(3)     | 77.11(9)   |
| N(1)-Zn(1)-N(3)   | 98.22(9)        | O(2)-Zn(1)-N(3)   | 101.15(9)  | O(7)-Zn(1)-N(3)     | 164.37(8)  |
| <b>5</b>          |                 |                   |            |                     |            |
| Zn(1)-O(1)        | 2.137(5)        | Zn(1)-O(7)        | 2.145(5)   | Zn(1)-O(8)          | 2.094(5)   |
| Zn(1)-N(1)        | 2.116(6)        | Zn(1)-N(2)        | 2.077(7)   | Zn(1)-N(3)          | 2.135(8)   |
| O(8)-Zn(1)-N(2)   | 98.7(3)         | N(2)-Zn(1)-N(1)   | 160.0(3)   | O(8)-Zn(1)-N(1)     | 100.2(2)   |
| N(3)-Zn(1)-N(2)   | 77.4(3)         | N(3)-Zn(1)-O(8)   | 86.4(2)    | N(1)-Zn(1)-N(3)     | 97.8(3)    |
| N(2)-Zn(1)-O(1)   | 85.0(3)         | O(1)-Zn(1)-O(8)   | 173.9(2)   | N(1)-Zn(1)-O(1)     | 76.7(2)    |
| N(3)-Zn(1)-O(1)   | 99.3(2)         | O(7)-Zn(1)-N(2)   | 90.9(3)    | O(8)-Zn(1)-O(7)     | 87.5(2)    |
| N(1)-Zn(1)-O(7)   | 96.0(2)         | O(7)-Zn(1)-N(3)   | 165.7(3)   | O(7)-Zn(1)-O(1)     | 87.5(2)    |
| <b>6</b>          |                 |                   |            |                     |            |
| Zn(1)-O(2)        | 2.085(3)        | Zn(1)-O(3)#1      | 2.558(3)   | Zn(1)-O(4)#1        | 2.018(3)   |
| Zn(1)-N(1)        | 2.130(3)        | Zn(1)-N(2)        | 2.091(3)   | Zn(1)-N(3)          | 2.143(3)   |
| O(4)#1-Zn(1)-N(2) | 151.81(13)      | N(2)-Zn(1)-N(1)   | 103.27(12) | O(4)#1-Zn(1)-N(1)   | 102.94(12) |
| N(3)-Zn(1)-N(2)   | 76.99(13)       | N(3)-Zn(1)-O(4)#1 | 90.90(12)  | N(1)-Zn(1)-N(3)     | 94.24(13)  |
| N(2)-Zn(1)-O(2)   | 99.44(12)       | O(2)-Zn(1)-O(4)#1 | 95.77(11)  | N(1)-Zn(1)-O(2)     | 78.50(11)  |
| N(3)-Zn(1)-O(2)   | 171.06(12)      | O(3)#1-Zn(1)-N(2) | 100.65(11) | O(4)#1-Zn(1)-O(3)#1 | 55.91(12)  |
| N(1)-Zn(1)-O(3)#1 | 154.44(13)      | O(3)#1-Zn(1)-N(3) | 99.83(12)  | O(3)#1-Zn(1)-O(2)   | 88.83(11)  |
| <b>7</b>          |                 |                   |            |                     |            |
| Co(1)-O(2)        | 2.086(2)        | Co(1)-O(5)#1      | 2.037(2)   | Co(1)-O(7)          | 2.060(2)   |

|                   |          |                   |            |                 |           |
|-------------------|----------|-------------------|------------|-----------------|-----------|
| Co(1)-N(1)        | 2.160(2) | Co(1)-N(2)        | 2.161(3)   | Co(1)-N(3)      | 2.167(3)  |
| O(5)#1-Co(1)-O(7) | 90.62(9) | O(5)#1-Co(1)-O(2) | 102.98(8)  | O(2)-Co(1)-O(7) | 93.37(8)  |
| O(5)#1-Co(1)-N(1) | 86.62(9) | O(7)-Co(1)-N(1)   | 169.87(8)  | O(2)-Co(1)-N(1) | 77.79(8)  |
| O(5)#1-Co(1)-N(2) | 91.21(9) | O(7)-Co(1)-N(2)   | 101.38(8)  | O(2)-Co(1)-N(2) | 159.43(9) |
| N(1)-Co(1)-N(2)   | 88.43(9) | O(5)#1-Co(1)-N(3) | 167.47(10) | O(7)-Co(1)-N(3) | 90.91(9)  |
| O(2)-Co(1)-N(3)   | 89.35(9) | N(1)-Co(1)-N(3)   | 93.89(10)  | N(2)-Co(1)-N(3) | 76.30(10) |

## 8

|                   |            |                   |           |                     |           |
|-------------------|------------|-------------------|-----------|---------------------|-----------|
| Cd(1)-O(1)        | 2.201(2)   | Cd(1)-O(6)#1      | 2.310(2)  | Cd(1)-O(7)          | 2.244(2)  |
| Cd(1)-N(1)#1      | 2.379(3)   | Cd(1)-N(2)        | 2.381(3)  | Cd(1)-N(3)          | 2.347(3)  |
| O(1)-Cd(1)-O(7)   | 91.28(9)   | O(1)-Cd(1)-O(6)#1 | 107.10(9) | O(7)-Cd(1)-O(6)#1   | 90.62(8)  |
| O(1)-Cd(1)-N(3)   | 161.41(10) | O(7)-Cd(1)-N(3)   | 89.86(9)  | O(6)#1-Cd(1)-N(3)   | 91.43(10) |
| O(1)-Cd(1)-N(1)#1 | 89.67(10)  | O(7)-Cd(1)-N(1)#1 | 161.55(9) | O(6)#1-Cd(1)-N(1)#1 | 71.52(9)  |
| N(3)-Cd(1)-N(1)#1 | 95.07(10)  | O(1)-Cd(1)-N(2)   | 91.22(10) | O(7)-Cd(1)-N(2)     | 111.39(9) |
| O(6)#1-Cd(1)-N(2) | 151.25(9)  | N(3)-Cd(1)-N(2)   | 71.14(10) | N(2)-Cd(1)-N(1)#1   | 87.01(9)  |

## 9

|                     |            |                     |            |                     |            |
|---------------------|------------|---------------------|------------|---------------------|------------|
| Pb(1)-O(1)          | 2.370(4)   | Pb(1)-O(1)#2        | 2.758(5)   | Pb(1)-O(3)#1        | 2.541(4)   |
| Pb(1)-O(4)#1        | 2.527(4)   | Pb(1)-N(1)          | 2.534(5)   | Pb(1)-O(6)#3        | 3.035(4)   |
| O(1)-Pb(1)-O(4)#1   | 95.35(15)  | O(1)-Pb(1)-N(1)     | 67.20(15)  | N(1)-Pb(1)-O(4)#1   | 78.85(15)  |
| O(1)-Pb(1)-O(3)#1   | 74.46(14)  | O(4)#1-Pb(1)-O(3)#1 | 51.39(14)  | N(1)-Pb(1)-O(3)#1   | 112.29(16) |
| O(1)-Pb(1)-O(1)#2   | 66.72(18)  | O(4)#1-Pb(1)-O(1)#2 | 133.76(13) | N(1)-Pb(1)-O(1)#2   | 124.81(14) |
| O(3)#1-Pb(1)-O(1)#2 | 82.40(14)  | O(6)#3-Pb(1)-O(1)   | 142.12(13) | O(6)#3-Pb(1)-O(1)#2 | 94.82(14)  |
| O(6)#3-Pb(1)-O(3)#1 | 70.34(14)  | O(6)#3-Pb(1)-O(4)#1 | 73.33(13)  | O(6)#3-Pb(1)-N(1)   | 140.35(15) |
| Pb(1)-O(1)-Pb(1)#2  | 113.28(18) |                     |            |                     |            |

## 10

|                   |            |                   |            |                  |            |
|-------------------|------------|-------------------|------------|------------------|------------|
| Cd(1)-O(1)        | 2.299(3)   | Cd(1)-O(3)#1      | 2.257(3)   | Cd(1)-O(7)       | 2.309(3)   |
| Cd(1)-N(1)        | 2.334(4)   | Cd(1)-N(2)        | 2.323(4)   | Cd(1)-N(3)       | 2.375(4)   |
| Cd(2)-O(5)        | 2.276(4)   | Cd(2)-Cl(1)       | 2.505(2)   | Cd(2)-N(4)       | 2.367(5)   |
| Cd(2)-N(5)        | 2.377(5)   | Cd(2)-N(6)        | 2.444(5)   | Cd(2)-N(7)       | 2.401(5)   |
| O(3)#1-Cd(1)-O(1) | 156.62(13) | O(3)#1-Cd(1)-O(7) | 86.79(12)  | O(1)-Cd(1)-O(7)  | 86.50(12)  |
| O(3)#1-Cd(1)-N(2) | 93.92(14)  | O(1)-Cd(1)-N(2)   | 109.02(14) | O(7)-Cd(1)-N(2)  | 95.70(14)  |
| O(3)#1-Cd(1)-N(1) | 88.36(14)  | O(1)-Cd(1)-N(1)   | 71.54(13)  | O(7)-Cd(1)-N(1)  | 103.54(13) |
| N(2)-Cd(1)-N(1)   | 160.73(15) | O(3)#1-Cd(1)-N(3) | 101.53(14) | O(1)-Cd(1)-N(3)  | 90.44(14)  |
| O(7)-Cd(1)-N(3)   | 164.70(14) | N(2)-Cd(1)-N(3)   | 71.14(16)  | N(1)-Cd(1)-N(3)  | 89.64(15)  |
| O(5)-Cd(2)-N(4)   | 86.47(17)  | O(5)-Cd(2)-N(5)   | 117.08(17) | N(4)-Cd(2)-N(5)  | 70.6(2)    |
| O(5)-Cd(2)-N(7)   | 82.86(17)  | N(4)-Cd(2)-N(7)   | 96.53(18)  | N(5)-Cd(2)-N(7)  | 154.43(17) |
| O(5)-Cd(2)-N(6)   | 150.36(16) | N(4)-Cd(2)-N(6)   | 87.96(16)  | N(5)-Cd(2)-N(6)  | 88.17(16)  |
| N(7)-Cd(2)-N(6)   | 68.90(16)  | O(5)-Cd(2)-Cl(1)  | 96.66(12)  | N(4)-Cd(2)-Cl(1) | 164.08(14) |
| N(5)-Cd(2)-Cl(1)  | 94.23(15)  | N(7)-Cd(2)-Cl(1)  | 99.35(12)  | N(6)-Cd(2)-Cl(1) | 96.62(12)  |

## 11

|                   |            |                     |            |                   |            |
|-------------------|------------|---------------------|------------|-------------------|------------|
| Zn(1)-O(1)        | 2.475(4)   | Zn(1)-O(1)#1        | 2.475(4)   | Zn(1)-O(2)        | 1.994(3)   |
| Zn(1)-O(2)#1      | 1.994(3)   | Zn(1)-N(2)          | 2.083(4)   | Zn(1)-N(2)#1      | 2.083(4)   |
| Zn(2)-O(3)#2      | 2.426(5)   | Zn(2)-O(4)#2        | 2.060(4)   | Zn(2)-O(5)        | 2.083(3)   |
| Zn(2)-N(1)        | 2.088(4)   | Zn(2)-N(3)          | 2.078(4)   | Zn(2)-N(4)        | 2.175(4)   |
| O(2)-Zn(1)-O(2)#1 | 124.0(2)   | O(2)-Zn(1)-N(2)#1   | 112.81(15) | O(2)-Zn(1)-N(2)   | 109.35(16) |
| N(2)-Zn(1)-N(2)#1 | 80.0(2)    | O(2)-Zn(1)-O(1)     | 57.49(13)  | O(2)#1-Zn(1)-O(1) | 91.71(14)  |
| N(2)#1-Zn(1)-O(1) | 157.47(15) | N(2)-Zn(1)-O(1)     | 84.58(15)  | O(1)-Zn(1)-O(1)#1 | 114.5(2)   |
| O(4)#2-Zn(2)-N(3) | 103.16(17) | O(4)#2-Zn(2)-O(5)   | 92.04(15)  | N(3)-Zn(2)-O(5)   | 98.39(15)  |
| O(4)#2-Zn(2)-N(1) | 147.23(17) | N(3)-Zn(2)-N(1)     | 109.24(15) | O(5)-Zn(2)-N(1)   | 78.75(14)  |
| O(4)#2-Zn(2)-N(4) | 94.40(16)  | N(3)-Zn(2)-N(4)     | 78.55(17)  | O(5)-Zn(2)-N(4)   | 173.36(15) |
| N(1)-Zn(2)-N(4)   | 96.61(15)  | O(4)#2-Zn(2)-O(3)#2 | 55.89(17)  | N(3)-Zn(2)-O(3)#2 | 157.20(16) |

|                     |            |                     |            |                      |            |
|---------------------|------------|---------------------|------------|----------------------|------------|
| O(5)-Zn(2)-O(3)#2   | 91.81(17)  | N(1)-Zn(2)-O(3)#2   | 92.68(16)  | N(4)-Zn(2)-O(3)#2    | 93.15(18)  |
| <b>12</b>           |            |                     |            |                      |            |
| Zn(1)-O(2)          | 1.973(3)   | Zn(1)-O(3)#1        | 1.950(3)   | Zn(1)-O(4)#1         | 2.763(3)   |
| Zn(1)-O(13)         | 1.913(4)   | Zn(1)-N(4)          | 2.069(4)   | Zn(2)-O(1)           | 2.177(3)   |
| Zn(2)-O(5)#2        | 2.105(3)   | Zn(2)-O(13)         | 1.920(4)   | Zn(2)-N(1)#2         | 2.069(4)   |
| Zn(2)-N(6)          | 2.062(4)   | Zn(3)-O(7)          | 1.968(3)   | Zn(3)-O(9)#3         | 2.737(3)   |
| Zn(3)-O(10)#3       | 1.934(3)   | Zn(3)-O(14)         | 1.921(3)   | Zn(3)-N(5)           | 2.072(4)   |
| Zn(4)-O(8)          | 2.162(3)   | Zn(4)-O(12)#4       | 2.103(3)   | Zn(4)-O(14)          | 1.915(3)   |
| Zn(4)-N(2)#4        | 2.063(4)   | Zn(4)-N(3)          | 2.061(4)   |                      |            |
| O(13)-Zn(1)-O(3)#1  | 122.57(14) | O(13)-Zn(1)-O(2)    | 112.64(15) | O(3)#1-Zn(1)-O(2)    | 104.21(13) |
| O(13)-Zn(1)-N(4)    | 104.15(16) | O(3)#1-Zn(1)-N(4)   | 110.84(15) | O(2)-Zn(1)-N(4)      | 100.33(14) |
| O(4)#1-Zn(1)-O(2)   | 155.89(13) | O(4)#1-Zn(1)-O(3)#1 | 51.95(13)  | O(4)#1-Zn(1)-O(13)   | 87.13(13)  |
| O(4)#1-Zn(1)-N(4)   | 87.27(13)  | O(13)-Zn(2)-N(6)    | 111.24(16) | O(13)-Zn(2)-N(1)#2   | 133.43(15) |
| N(6)-Zn(2)-N(1)#2   | 115.28(14) | O(13)-Zn(2)-O(5)#2  | 98.53(14)  | N(6)-Zn(2)-O(5)#2    | 95.66(14)  |
| N(1)#2-Zn(2)-O(5)#2 | 79.14(13)  | O(13)-Zn(2)-O(1)    | 91.05(14)  | N(6)-Zn(2)-O(1)      | 89.66(13)  |
| N(1)#2-Zn(2)-O(1)   | 87.36(12)  | O(1)-Zn(2)-O(5)#2   | 166.50(12) | O(14)-Zn(3)-O(10)#3  | 121.78(13) |
| O(14)-Zn(3)-O(7)    | 110.66(14) | O(7)-Zn(3)-O(10)#3  | 106.17(14) | O(14)-Zn(3)-N(5)     | 105.08(15) |
| N(5)-Zn(3)-O(10)#3  | 109.97(15) | N(5)-Zn(3)-O(7)     | 101.34(14) | O(10)#3-Zn(3)-O(9)#3 | 51.94(13)  |
| O(7)-Zn(3)-O(9)#3   | 157.35(14) | O(14)-Zn(3)-O(9)#3  | 81.74(14)  | N(5)-Zn(3)-O(9)#3    | 93.11(14)  |
| O(14)-Zn(4)-N(3)    | 111.09(15) | O(14)-Zn(4)-N(2)#4  | 135.61(15) | N(3)-Zn(4)-N(2)#4    | 113.30(15) |
| O(14)-Zn(4)-O(12)#4 | 98.17(14)  | N(3)-Zn(4)-O(12)#4  | 92.98(15)  | N(2)#4-Zn(4)-O(12)#4 | 79.50(14)  |
| O(14)-Zn(4)-O(8)    | 92.25(14)  | N(3)-Zn(4)-O(8)     | 90.03(14)  | N(2)#4-Zn(4)-O(8)    | 87.96(13)  |
| O(12)#4-Zn(4)-O(8)  | 167.29(13) | Zn(1)-O(13)-Zn(2)   | 117.84(17) | Zn(3)-O(14)-Zn(4)    | 116.72(16) |

<sup>a</sup> Symmetry transformations used to generate equivalent atoms: #1  $x, -y+1/2, -z+1/2$  for **1**; #1  $-x+2, -y, -z+1$  for **6**; #1  $-x+1, y+1/2, -z+1/2$  for **7**; #1  $-x, y+1/2, -z+1/2$  for **8**; #1  $-x+1, -y+2, -z+1$ ; #2  $-x+2, -y+3, -z+1$ ; #3  $x+1, y+1, z+1$  for **9**; #1  $-x+2, -y+2, -z+1$  for **10**; #1  $-x+1, y, -z+1/2$ ; #2  $-x+2, -y, -z$  for **11**; #1  $x, y+1, z$ ; #2  $-x, -y+1, -z+1$ ; #3  $x, y-1, z$ ; #4  $-x+1, -y+3, -z$  for **12**.

**Table S2.** Hydrogen bonds in crystal packing [ $\text{\AA}$ ,  $^\circ$ ] of **1–12**.

| Complexes | D-H...A             | $d(\text{D-H})$ | $d(\text{H...A})$ | $d(\text{D...A})$ | $\angle\text{DHA}$ | Symmetry code         |
|-----------|---------------------|-----------------|-------------------|-------------------|--------------------|-----------------------|
| <b>1</b>  | O(4)-H(4)···O(3)    | 0.811           | 1.853             | 2.618             | 156.97             | $-x+1/2, -y, z$       |
|           | O(5)-H(5)···O(2)    | 0.768           | 1.896             | 2.649             | 166.44             | $x+1/2, y-1/2, z$     |
|           | O(7)-H(1W)···O(6)   | 0.751           | 2.035             | 2.734             | 154.99             | $x-1/2, y+1/2, z$     |
|           | O(7)-H(2W)···O(1)   | 0.768           | 1.938             | 2.695             | 168.64             | $-x+1/2, y, z-1/2$    |
| <b>2</b>  | O(5)-H(1)···O(1)    | 0.820           | 1.792             | 2.602             | 169.41             | $x+1, y, z+1$         |
|           | O(7)-H(1W)···O(4)   | 0.813           | 1.970             | 2.729             | 155.28             | $x-1, y, z$           |
|           | O(7)-H(2W)···O(1)   | 0.811           | 1.945             | 2.750             | 172.49             | $-x+1, -y+1, -z+1$    |
|           | O(8)-H(3W)···O(3)   | 0.944           | 1.688             | 2.631             | 178.38             | $-x+2, -y+2, -z+2$    |
|           | O(8)-H(4W)···O(4)   | 0.847           | 1.865             | 2.703             | 170.22             | $x-1, y, z$           |
| <b>3</b>  | O(5)-H(1)···O(1)    | 0.820           | 1.783             | 2.594             | 169.52             | $x+1, y, z+1$         |
|           | O(7)-H(1W)···O(4)   | 0.872           | 1.877             | 2.733             | 167.08             | $x-1, y, z$           |
|           | O(7)-H(2W)···O(1)   | 0.871           | 1.918             | 2.742             | 157.06             | $-x+1, -y+1, -z+1$    |
|           | O(8)-H(3W)···O(3)   | 0.850           | 1.790             | 2.640             | 179.48             | $-x+2, -y+2, -z+2$    |
|           | O(8)-H(4W)···O(4)   | 0.850           | 1.853             | 2.703             | 179.34             | $x-1, y, z$           |
| <b>4</b>  | O(5)-H(1)···O(1)    | 0.820           | 1.793             | 2.603             | 168.80             | $x-1, y, z-1$         |
|           | O(7)-H(1W)···O(1)   | 0.879           | 1.871             | 2.749             | 176.21             | $-x+2, -y+1, -z+1$    |
|           | O(7)-H(2W)···O(3)   | 0.877           | 1.901             | 2.722             | 155.25             | $x+1, y, z$           |
|           | O(8)-H(3W)···O(4)   | 0.854           | 2.122             | 2.650             | 119.61             | $-x+1, -y, -z$        |
|           | O(8)-H(4W)···O(3)   | 0.854           | 2.141             | 2.712             | 123.91             | $x+1, y, z$           |
| <b>5</b>  | O(6)-H(6)···O(2)    | 0.820           | 1.836             | 2.625             | 161.23             | $x-1, y, z$           |
|           | O(7)-H(1W)···O(26)  | 0.820           | 2.084             | 2.883             | 164.77             |                       |
|           | O(7)-H(2W)···O(11)  | 0.850           | 1.872             | 2.722             | 179.65             |                       |
|           | O(8)-H(3W)···O(3)   | 0.820           | 1.861             | 2.665             | 166.21             | $-x+1, -y+1, -z+1$    |
|           | O(8)-H(4W)···O(11)  | 0.850           | 1.873             | 2.723             | 179.89             |                       |
| <b>6</b>  | O(6)-H(1)···O(1)    | 0.820           | 1.776             | 2.584             | 168.06             | $x-1, y, z-1$         |
|           | O(3)-H(1)···O(1)    | 0.820           | 1.748             | 2.566             | 174.89             | $-x+2, y-1/2, -z+1/2$ |
|           | O(7)-H(1W)···O(2)   | 0.876           | 2.041             | 2.818             | 147.39             | $-x+2, -y+2, -z+1$    |
| <b>7</b>  | O(7)-H(2W)···O(6)   | 0.875           | 1.761             | 2.615             | 164.82             | $x+1, -y+3/2, z+1/2$  |
|           | O(3)-H(3)···O(5)    | 0.820           | 1.743             | 2.556             | 170.97             | $-x-1, y+1/2, -z+1/2$ |
|           | O(7)-H(1W)···O(2)   | 0.847           | 1.801             | 2.642             | 171.79             | $-x+1, -y+1, -z$      |
| <b>8</b>  | O(7)-H(2W)···O(6)   | 0.829           | 2.006             | 2.810             | 163.59             | $x+1, -y+1/2, z-1/2$  |
|           | O(5)-H(5)···O(7)    | 0.820           | 1.796             | 2.604             | 168.54             | $-x, -y, -z$          |
|           | O(7)-H(1W)···O(3)   | 0.850           | 1.873             | 2.723             | 179.91             |                       |
| <b>9</b>  | O(7)-H(2W)···O(8)   | 0.850           | 1.904             | 2.754             | 179.79             | $-x+1, -y+1, -z+1$    |
|           | O(8)-H(3W)···O(4)   | 0.850           | 1.915             | 2.765             | 179.64             | $-x+1, -y+2, -z+1$    |
|           | O(8)-H(4W)···O(2)   | 0.850           | 1.852             | 2.702             | 179.85             | $x, y-1, z$           |
|           | O(7)-H(1W)···O(1)   | 0.85            | 1.850             | 2.700             | 179.57             | $-x+2, -y+1, -z+1$    |
|           | O(7)-H(2W)···O(4)   | 0.850           | 1.830             | 2.680             | 179.53             | $-x+2, -y+2, -z+1$    |
| <b>10</b> | O(8)-H(3W)···O(6)   | 0.850           | 1.966             | 2.816             | 179.02             |                       |
|           | O(9)-H(5W)···O(4)   | 0.850           | 1.968             | 2.818             | 178.74             | $x, y-1, z$           |
|           | O(10)-H(7W)···O(2)  | 0.871           | 1.923             | 2.787             | 170.92             |                       |
|           | O(11)-H(9W)···O(12) | 0.620           | 2.186             | 2.680             | 138.24             | $-x+1, -y+1, -z+1$    |



|           |                      |       |       |       |        |                        |
|-----------|----------------------|-------|-------|-------|--------|------------------------|
|           | O(12)-H(11W)···O(10) | 0.850 | 1.972 | 2.822 | 177.93 |                        |
| <b>11</b> | O(7)-H(1W)···O(2)    | 0.850 | 1.968 | 2.818 | 179.38 |                        |
|           | O(7)-H(2W)···O(8)    | 1.005 | 1.789 | 2.710 | 150.65 | $x+1, y, z$            |
|           | O(8)-H(3W)···O(7)    | 0.977 | 1.809 | 2.753 | 161.40 | $-x+1, y, -z+1/2$      |
|           | O(8)-H(4W)···O(9)    | 0.850 | 2.126 | 2.976 | 178.89 | $-x+1/2, -y+1/2, -z+1$ |
|           | O(9)-H(5W)···O(6)    | 0.850 | 1.907 | 2.757 | 179.07 | $x-1/2, y+1/2, z+1$    |
| <b>12</b> | O(15)-H(1W)···O(11)  | 0.850 | 1.997 | 2.847 | 179.10 | $-x, -y+2, -z$         |
|           | O(15)-H(2W)···O(16)  | 0.850 | 2.003 | 2.853 | 178.64 |                        |
|           | O(16)-H(3w)···O(6)   | 0.850 | 1.957 | 2.807 | 179.26 | $-x+1, -y+1, -z+1$     |
|           | O(16)-H(4W)···O(4)   | 0.850 | 2.113 | 2.963 | 179.13 |                        |

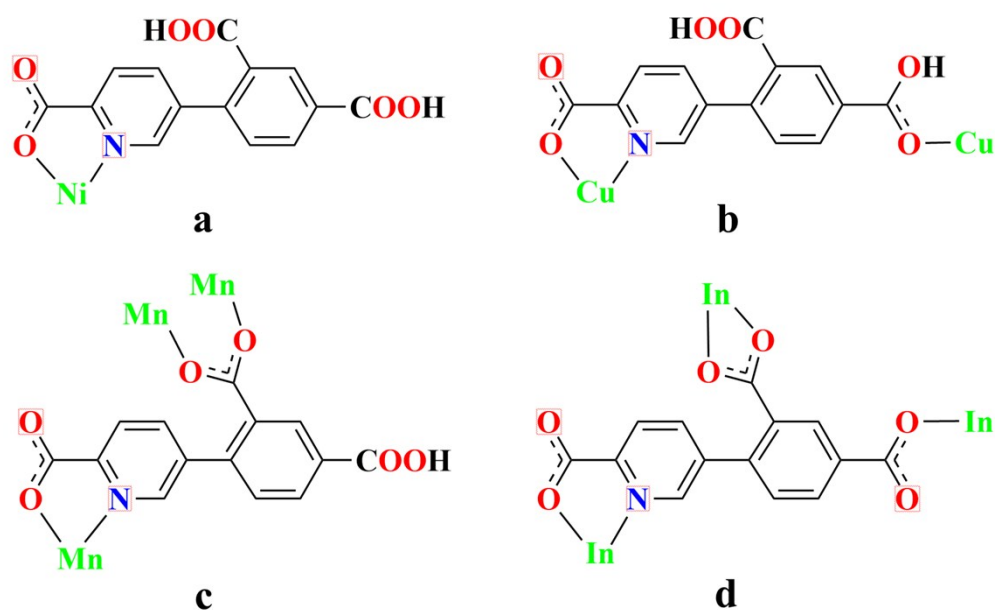

**Scheme S1** Coordination modes of  $\text{H}_2\text{cpia}^-$ ,  $\text{Hcpia}^{2-}$ , or  $\text{cpia}^{3-}$  in other reported compounds.

**Table S3.** Emission wavelengths (nm) of compounds **4–6**, **8–12**, and  $\text{H}_3\text{cpia}$ .

|                       |                                           |           |           |           |          |
|-----------------------|-------------------------------------------|-----------|-----------|-----------|----------|
| <b>Compound</b>       | <b><math>\text{H}_3\text{cpia}</math></b> | <b>4</b>  | <b>5</b>  | <b>6</b>  | <b>8</b> |
| $\lambda_{\text{em}}$ | 371                                       | 366, 384  | 349, 370  | 371       | 367, 386 |
| <b>Compound</b>       | <b>9</b>                                  | <b>10</b> | <b>11</b> | <b>12</b> |          |
| $\lambda_{\text{em}}$ | 374                                       | 368, 385  | 377, 394  | 377       |          |

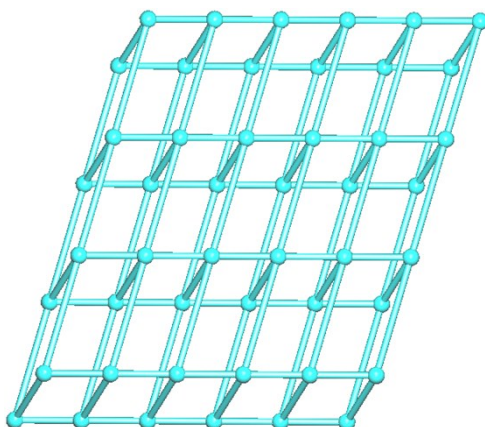

**Fig. S1.** Topological view of a simplified 2D H-bonded layer in **4** showing a uninodal 5-connected net with the SnS [SP 2-periodic net (4,4)Ia] topology and the  $(4^8.6^2)$  point symbol; view along the  $b$  axis; centroids of 5-connected  $[\text{Zn}(\text{Hcpia})(2,2'\text{-bipy})(\text{H}_2\text{O})_2]$  nodes (cyan balls).

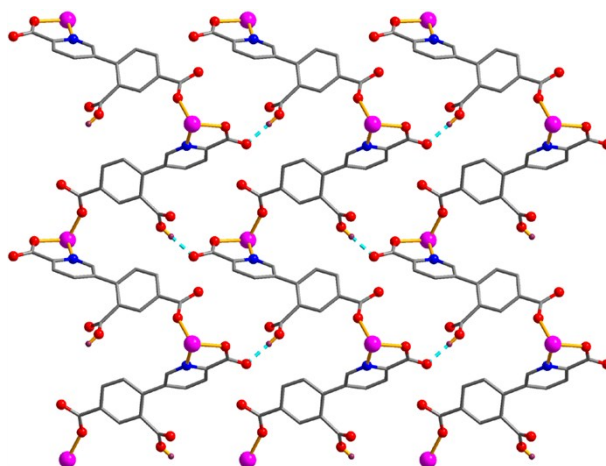

**Fig. S2.** 2D supramolecular network in **7** viewed along the  $ab$  plane (blue dashed lines represent the H-bonds).

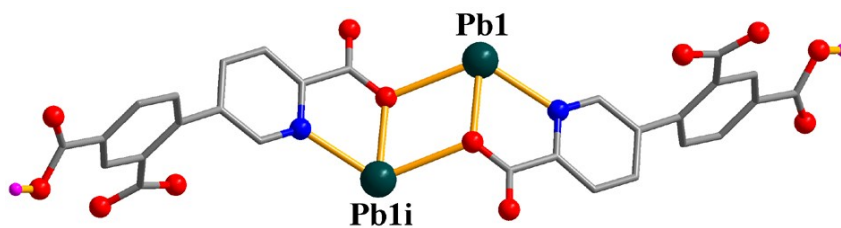

**Fig. S3.** Dimeric  $[\text{Pb}_2(\mu_4\text{-Hcpia})_2]$  unit in **9**. Symmetry code:  $i = -x + 2, -y + 3, -z + 1$ .

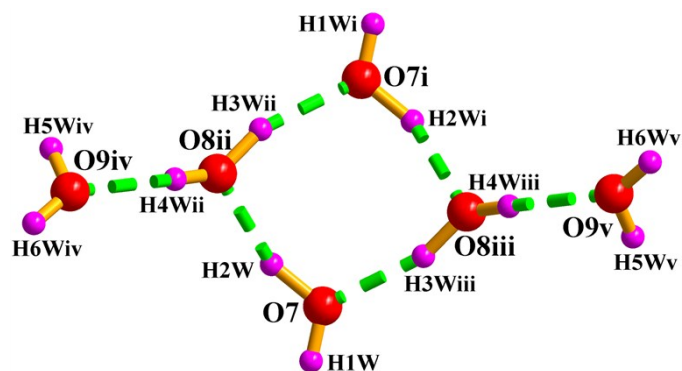

**Fig. S4.** Hexameric  $(\text{H}_2\text{O})_6$  cluster with a cyclic  $(\text{H}_2\text{O})_4$  core in **11**. Symmetry codes:  $i = -x + 2, y, -z + 1/2$ ;  $ii = x + 1, y, z$ ;  $iii = -x + 1, y, -z + 1/2$ ;  $iv = -x + 3/2, -y + 1/2, -z + 1$ ;  $v = x + 1/2, -y + 1/2, z - 1/2$ .

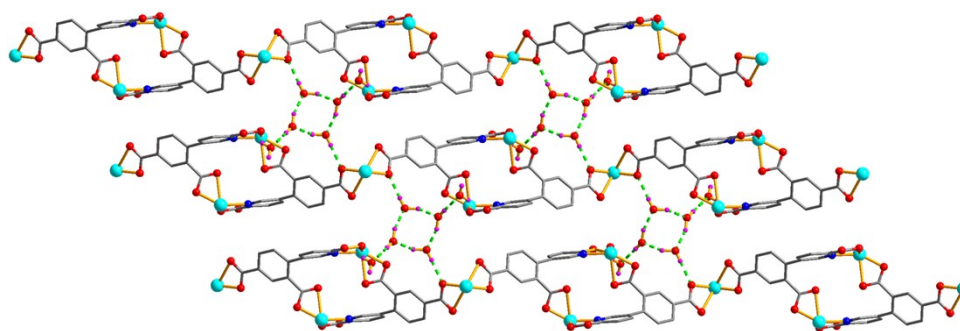

**Fig. S5.** The 2D H-bonded layer in **11** (view along the  $b$  axis, green dashed lines represent the H-bonds).

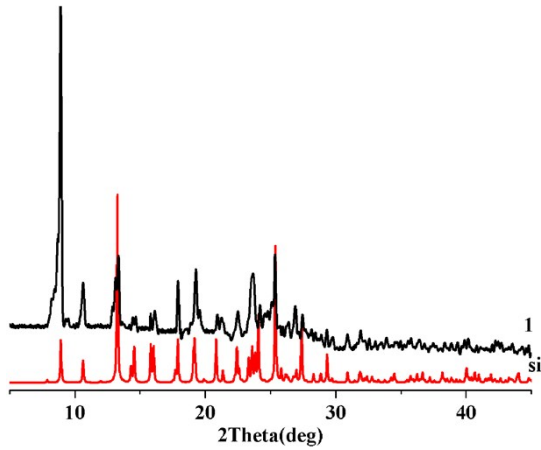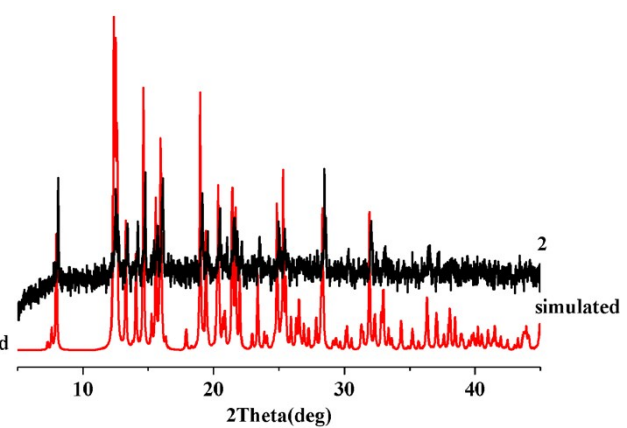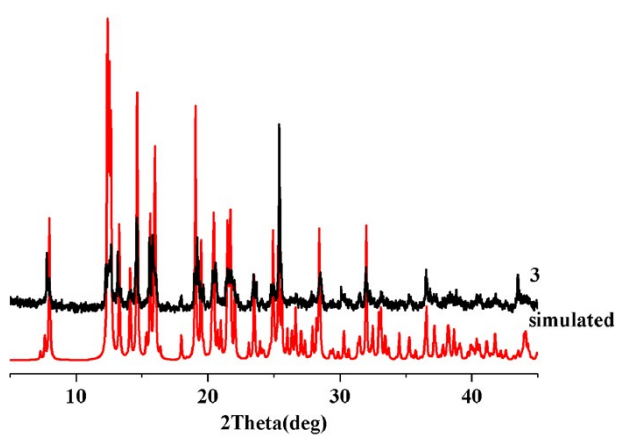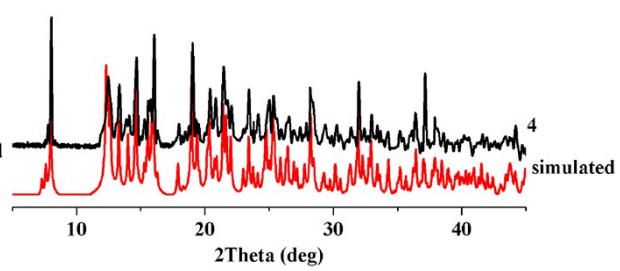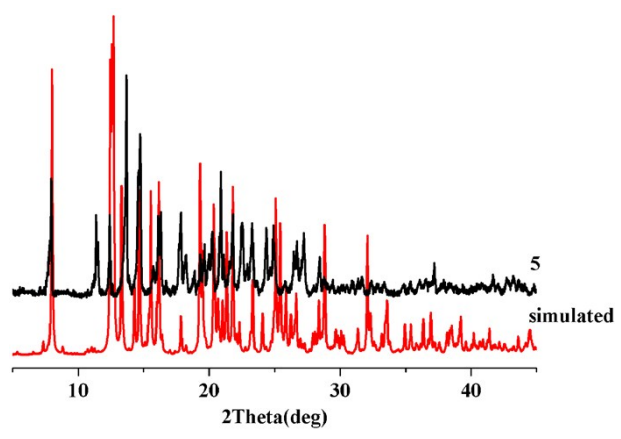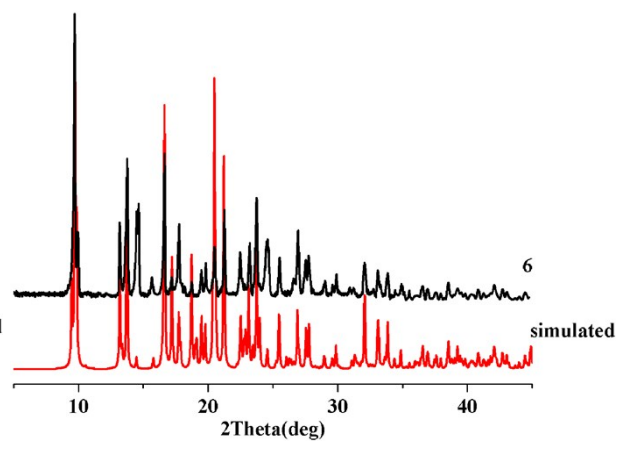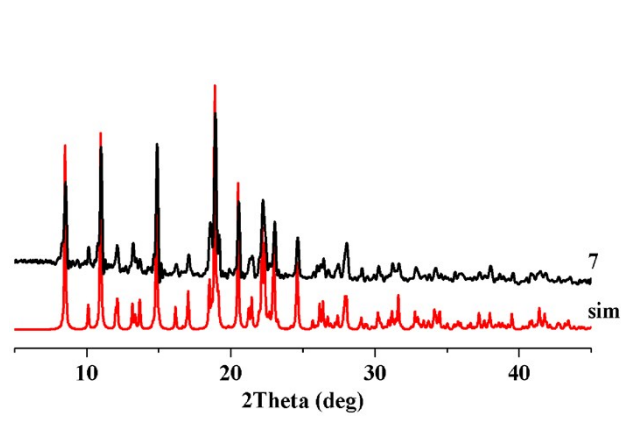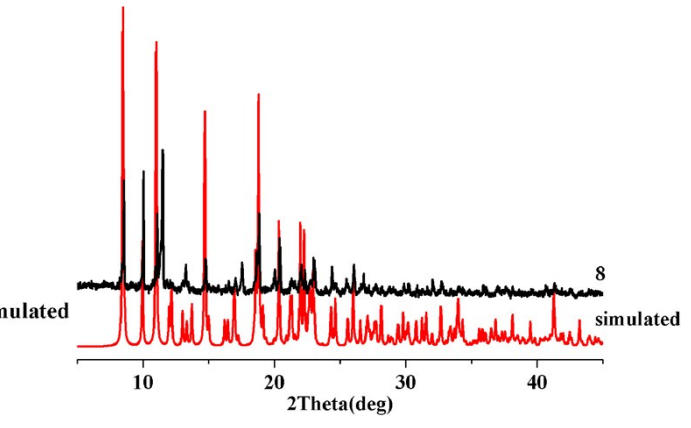

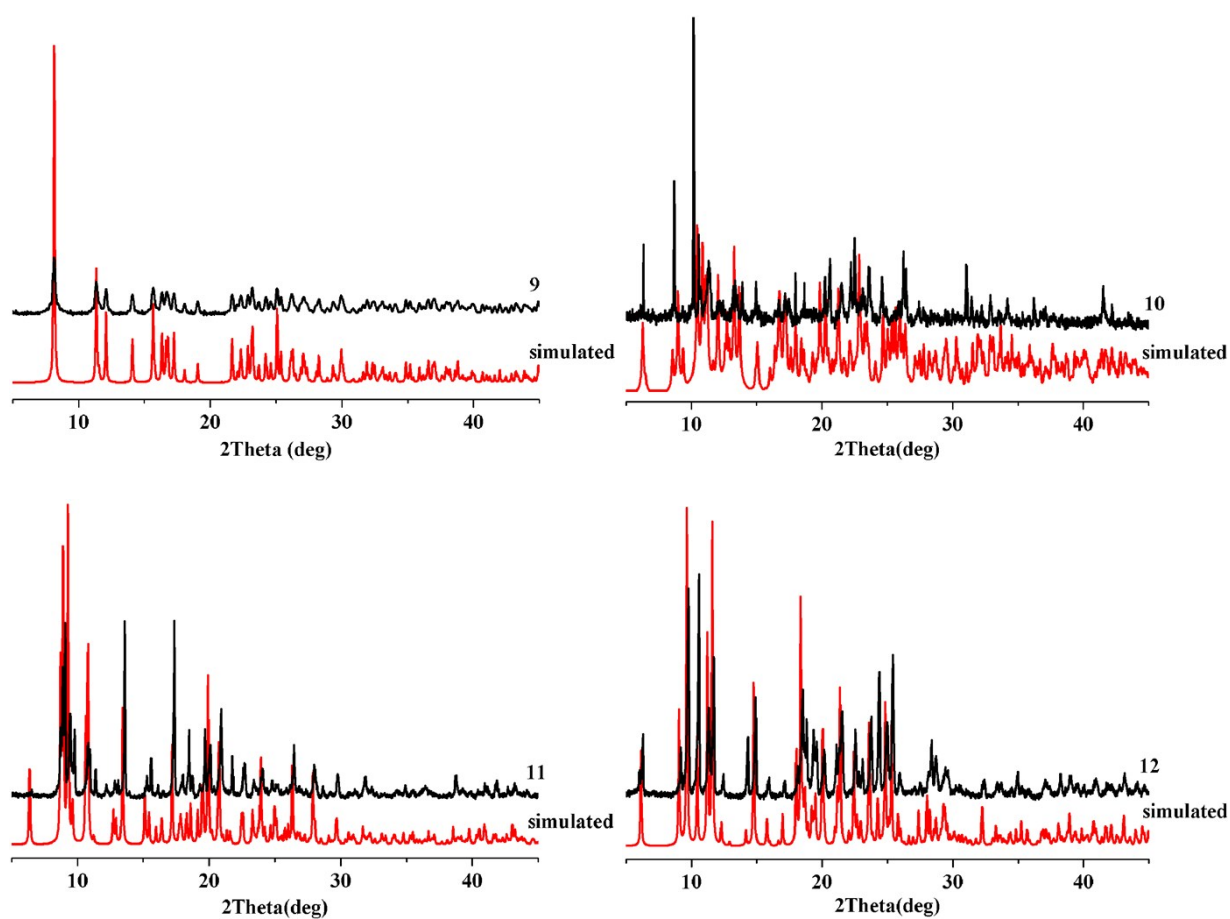

**Fig. S6.** PXR D patterns of compounds **1–12** at room temperature. Black patterns correspond to the experimental data obtained using the as-synthesized bulk samples. Red patterns were simulated from the single crystal X-ray data.

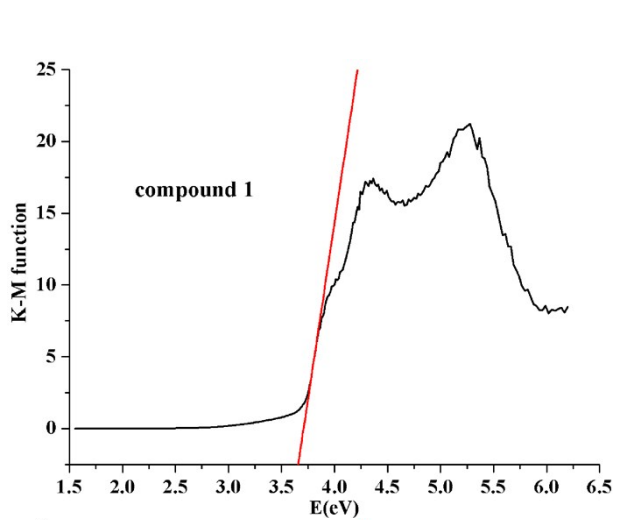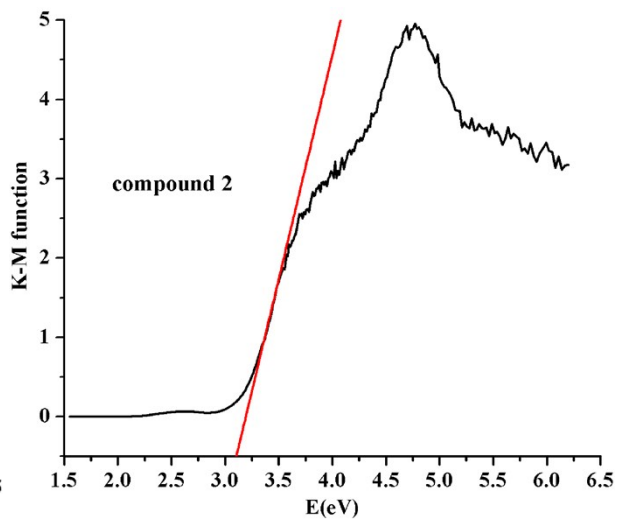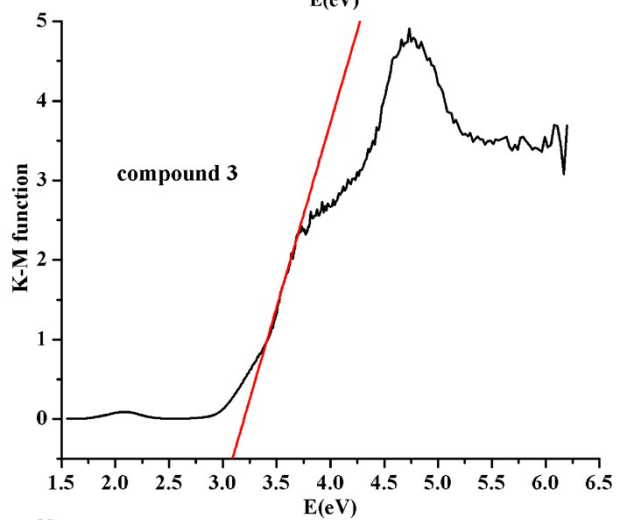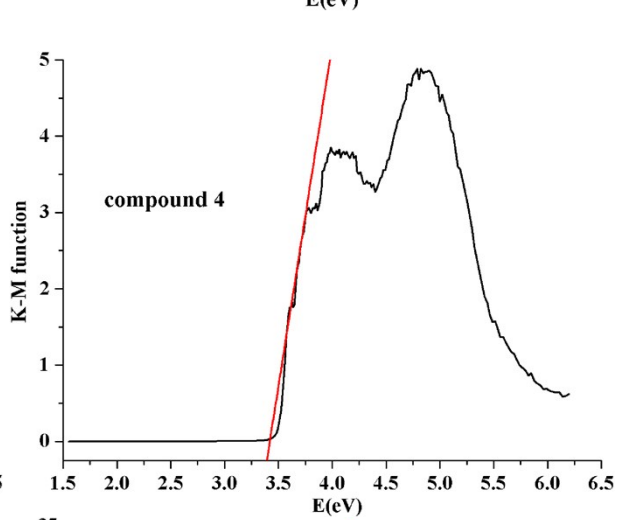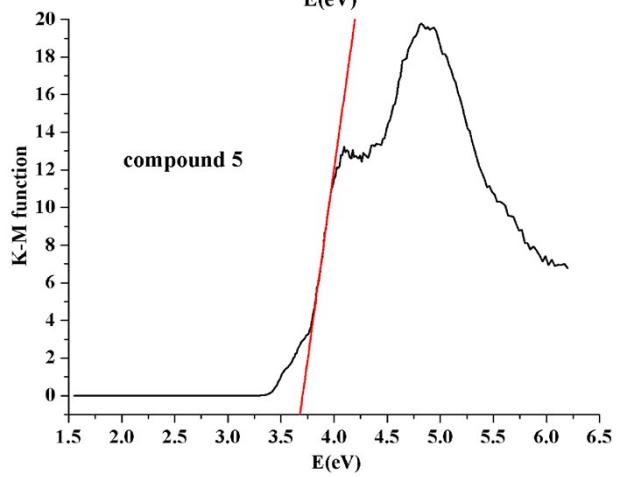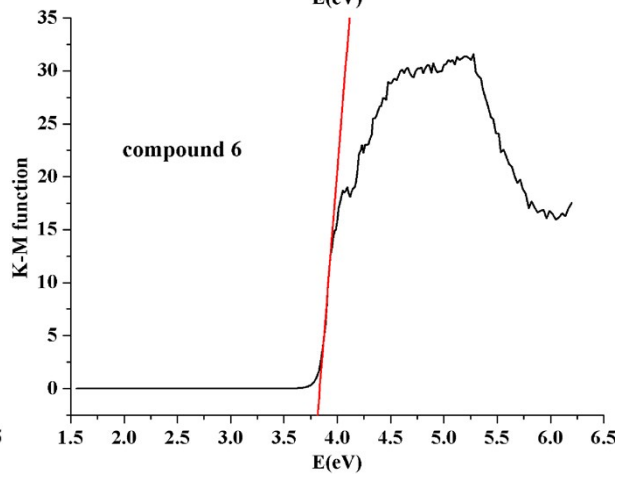

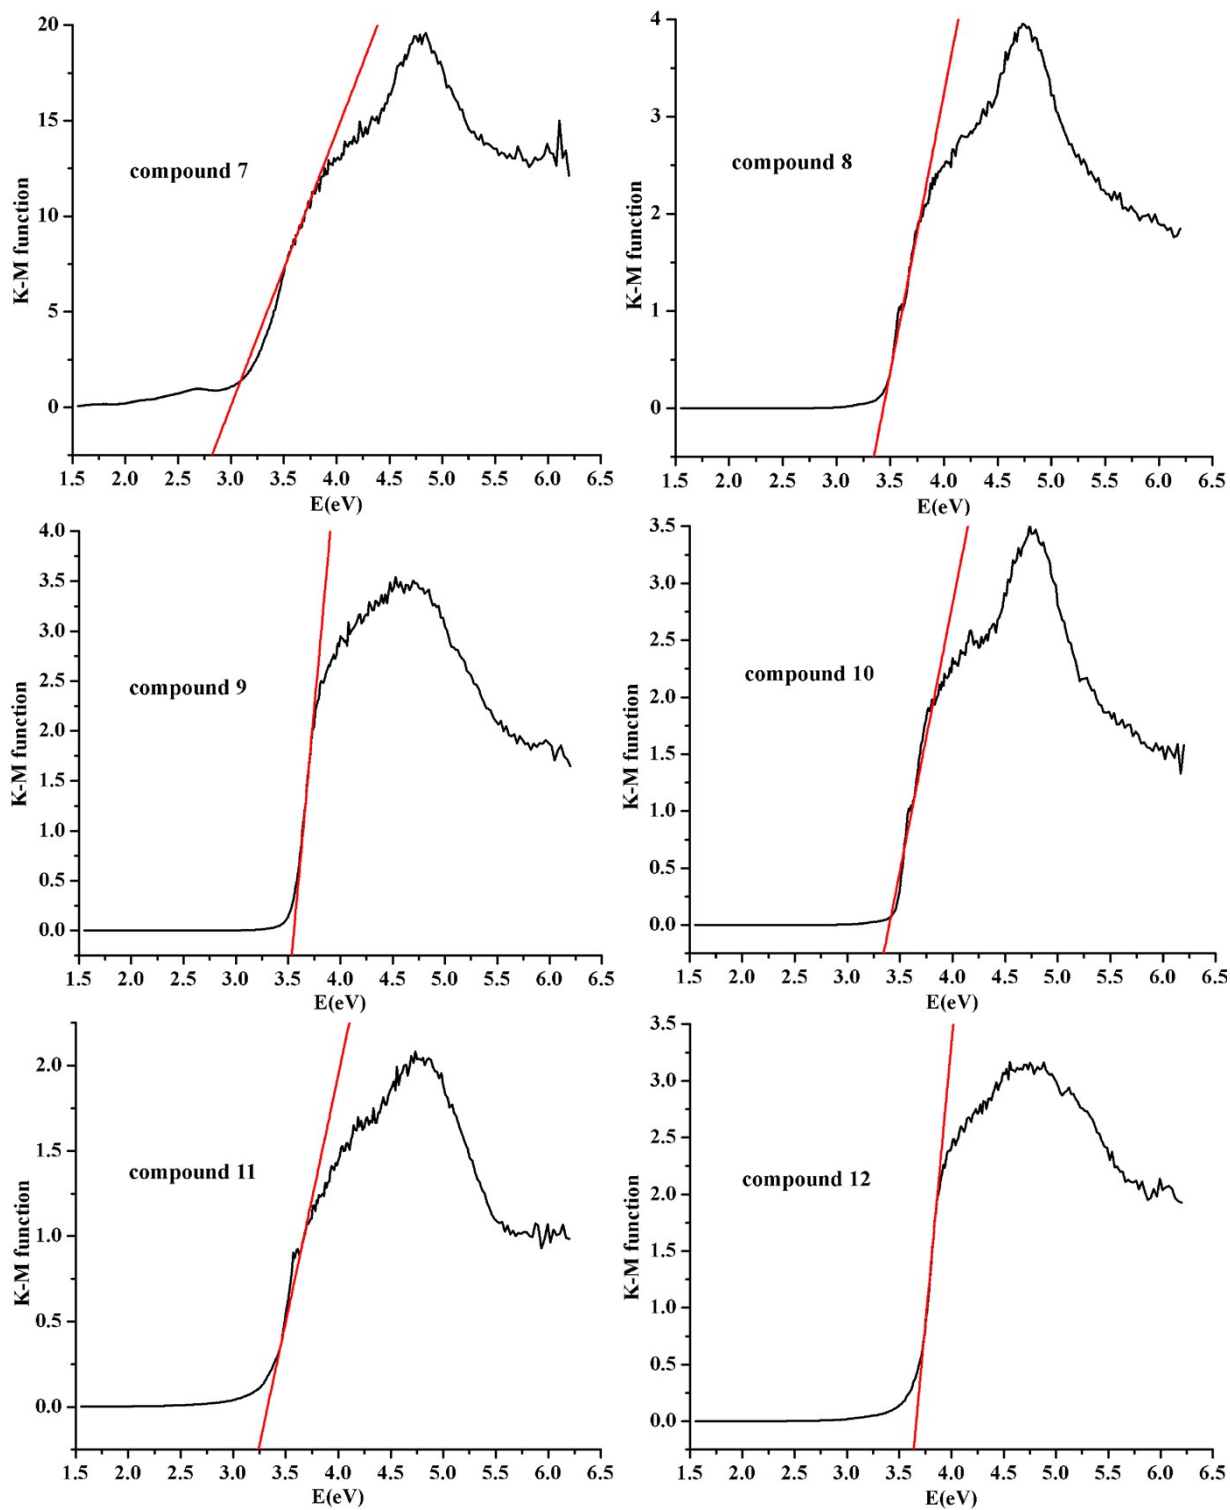

**Fig. S7.** Kubelka-Munk-transformed diffuse reflectance spectra of compounds 1–12.

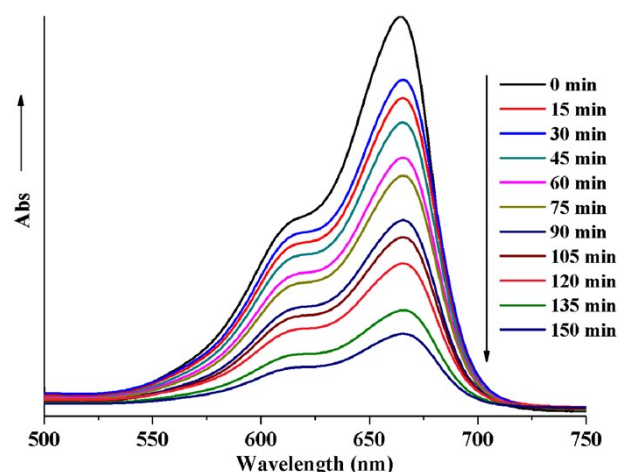

**Fig. S8.** Time-dependent UV-Vis spectra of the reaction mixtures in the course of the MB photodegradation catalyzed by 7. Reaction conditions: catalyst (50 mg), 100 mL aqueous solution, MB (1 mg), under 125 W Hg lamp irradiation.

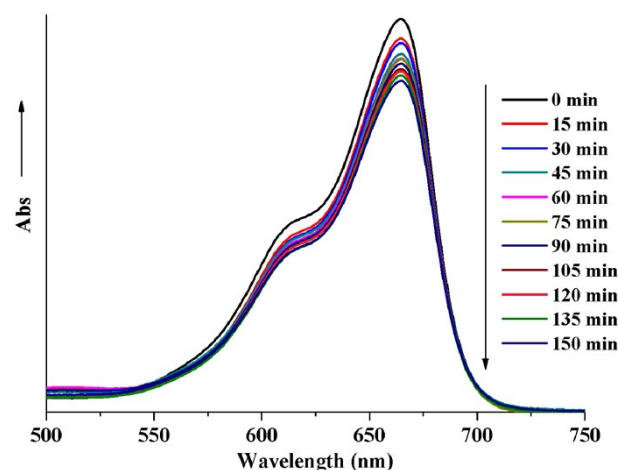

**Fig. S9.** Time-dependent UV-Vis spectra of the reaction mixtures in the course of the MB photodegradation catalyzed by H<sub>3</sub>dbba (blank test). Reaction conditions: H<sub>3</sub>cpia (50 mg), 100 mL aqueous solution, MB (1 mg), under 125 W Hg lamp irradiation.

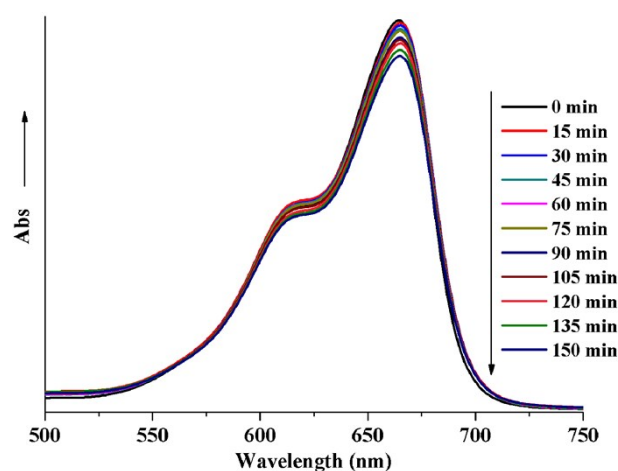

**Fig. S10.** Time-dependent UV-Vis spectra of the reaction mixtures in the course of the MB photodegradation catalyzed by phen (blank test). Reaction conditions: phen (50 mg), 100 mL aqueous solution, MB (1 mg), under 125 W Hg lamp irradiation.



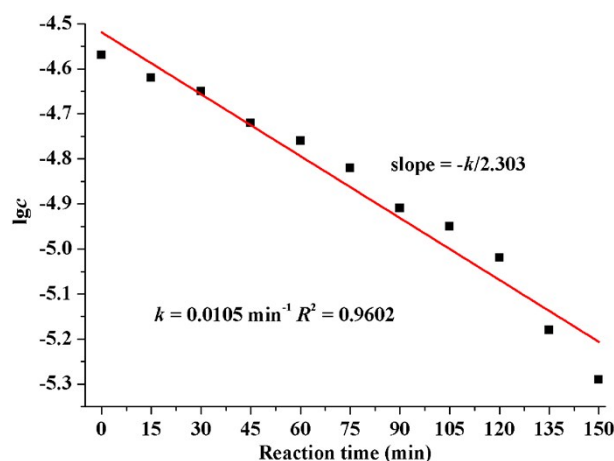

**Fig. S11.** Relationship between  $\lg c$  and reaction time in the course of the MB photodegradation catalyzed by 7. The red line corresponds to a linear fit. Reaction conditions: catalyst (50 mg), 100 mL aqueous solution, MB (1 mg), under 125 W Hg lamp irradiation.

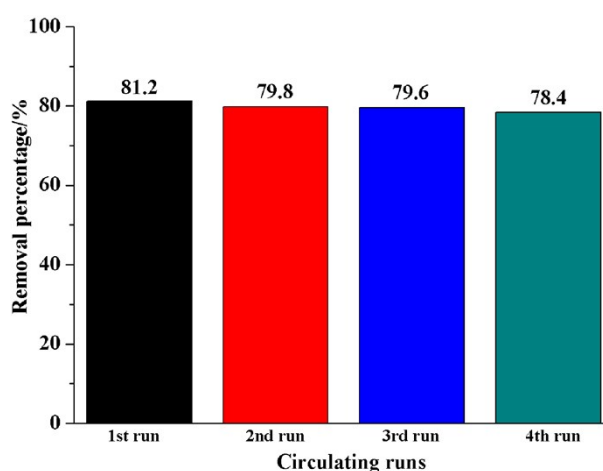

**Fig. S12.** Catalyst recycling experiments in the MB photodegradation (removal efficiency, %) under the UV light irradiation with catalyst 7. Reaction conditions: catalyst (50 mg), 100 mL aqueous solution, MB (1 mg), under 125 W Hg lamp irradiation.

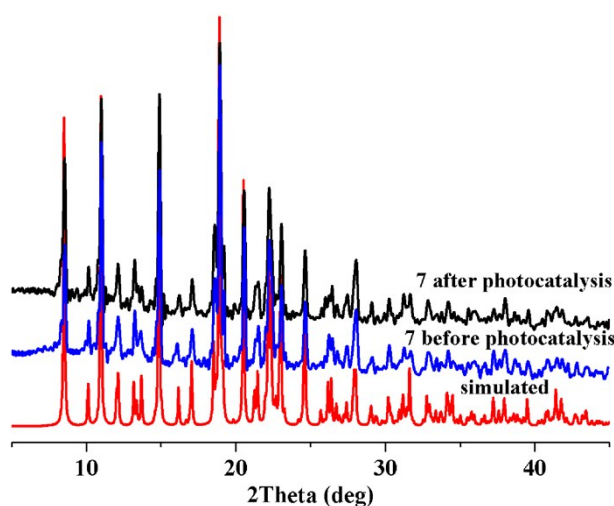

**Fig. S13.** PXRD patterns for 7: simulated (red), before (blue) and after (black) photocatalysis.
